## CORRECTION

# Correction: Tracking Resilience to Infections by Mapping Disease Space

The *PLOS Biology* Staff

## Notice of Republication

This article was republished on May 19<sup>th</sup>, 2016 to correct poor figure quality in the PDF version, which was introduced during the typesetting process. The publisher apologizes for these issues with the figure quality. Please download this article again to view the updated version.

## Reference

1. Torres BY, Oliveira JHM, Thomas Tate A, Rath P, Cumnock K, Schneider DS (2016) Tracking Resilience to Infections by Mapping Disease Space. *PLoS Biol* 14(4): e1002436. doi: [10.1371/journal.pbio.1002436](https://doi.org/10.1371/journal.pbio.1002436) PMID: [27088359](https://pubmed.ncbi.nlm.nih.gov/27088359/)

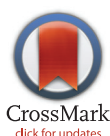

click for updates

## OPEN ACCESS

**Citation:** The *PLOS Biology* Staff (2016) Correction: Tracking Resilience to Infections by Mapping Disease Space. *PLoS Biol* 14(6): e1002494. doi:10.1371/journal.pbio.1002494

**Published:** June 8, 2016

**Copyright:** © 2016 The PLOS Biology Staff. This is an open access article distributed under the terms of the [Creative Commons Attribution License](https://creativecommons.org/licenses/by/4.0/), which permits unrestricted use, distribution, and reproduction in any medium, provided the original author and source are credited.
